# Supplementary material for: Total Bio-Based Material for Drug Delivery and Iron Chelation to Fight Cancer through Antimicrobial Activity
Source: MDPI journal article supplement (doi:10.3390/nano13142036), 2023-07-10
Supplement: s1 [file s1]

## Total Bio-Based Material for Drug Delivery and Iron Chelation to Fight Cancer through Antimicrobial Activity

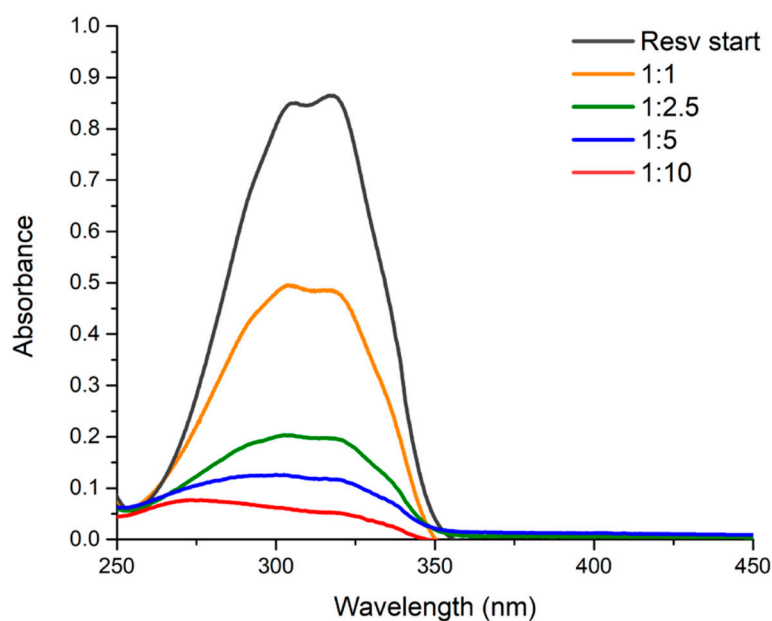

**Figure S1.** UV spectra of the loading capacity of resveratrol on the HNTs-kojic system with different ratios.

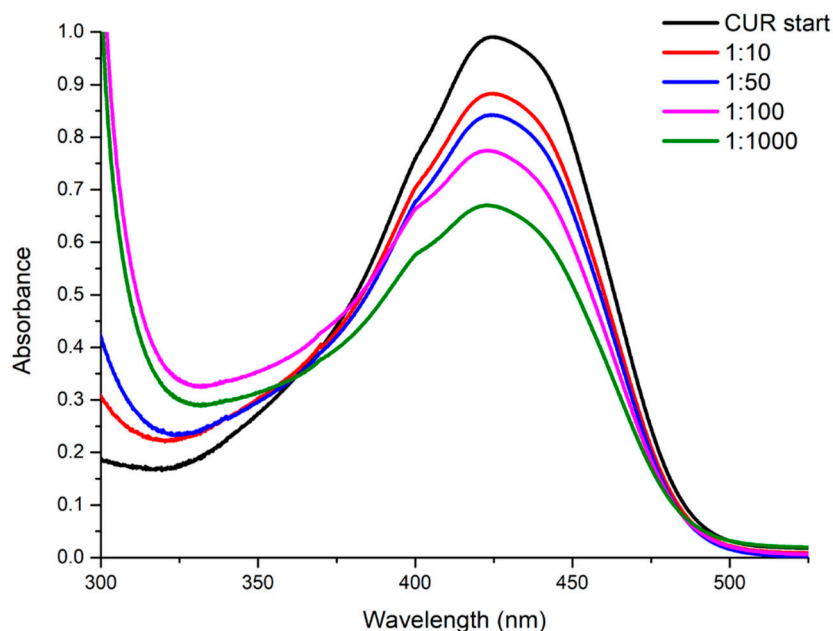

**Figure S2.** UV spectra of the loading capacity of curcumin on the HNTs-kojic system with different ratios.

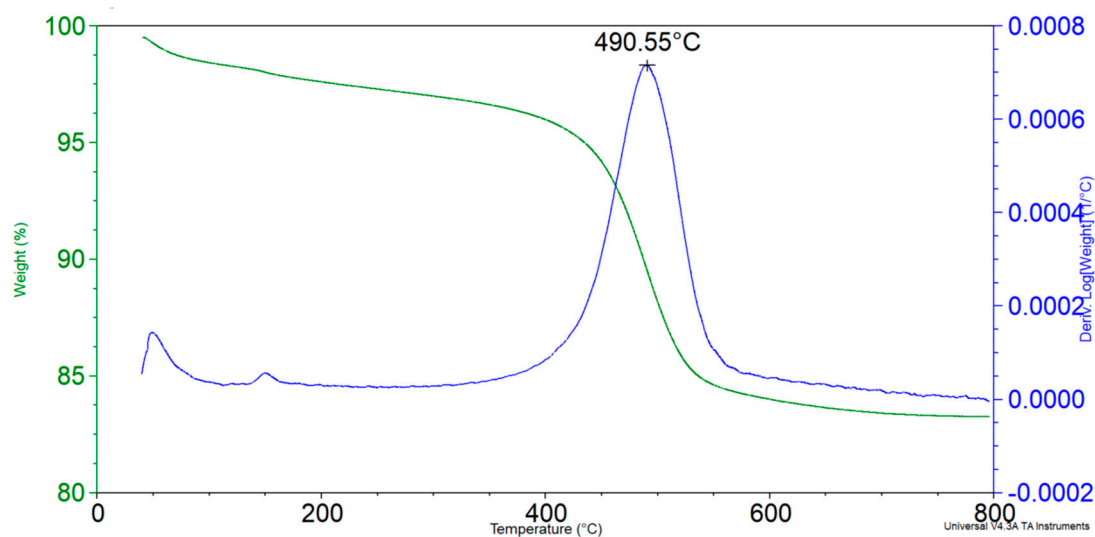

Figure S3. TGA of HNTs.

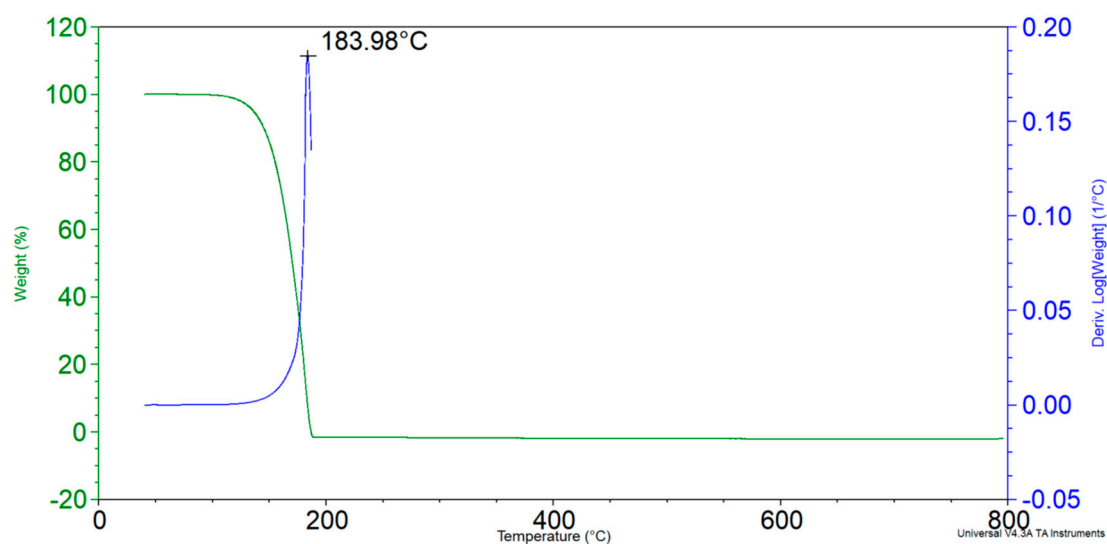

Figure S4. TGA of 2.

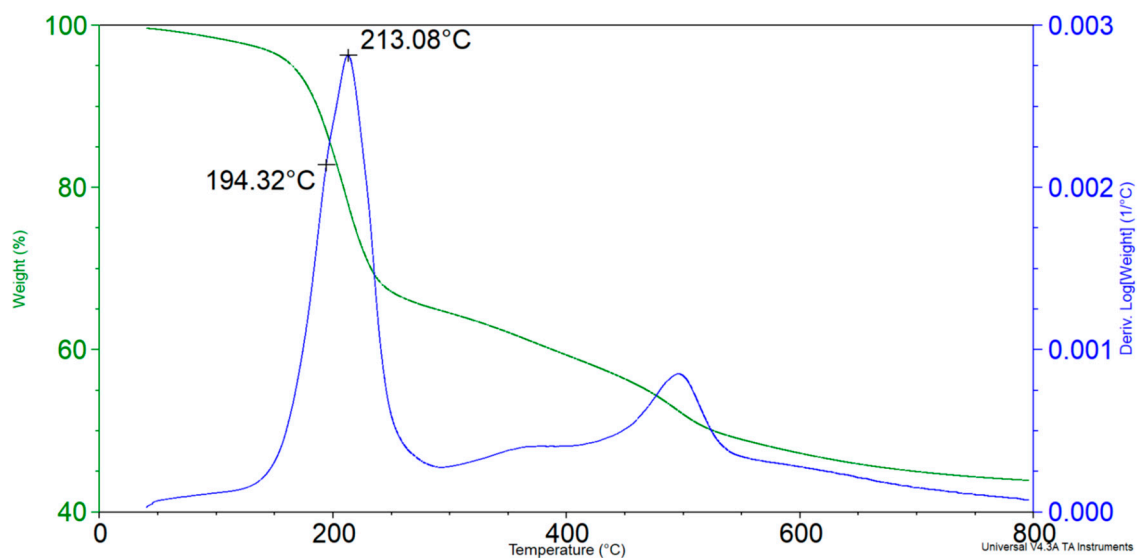

Figure S5. TGA of 3.
